# Supplementary figures and images for: The Prevalence and Characteristics of Exocrine Pancreatic Insufficiency in Patients with Type 2 Diabetes: A Systematic Review and Meta-Analysis
Source: Hindawi journal article supplement (doi:10.1155/2022/7764963), 2022-07-19

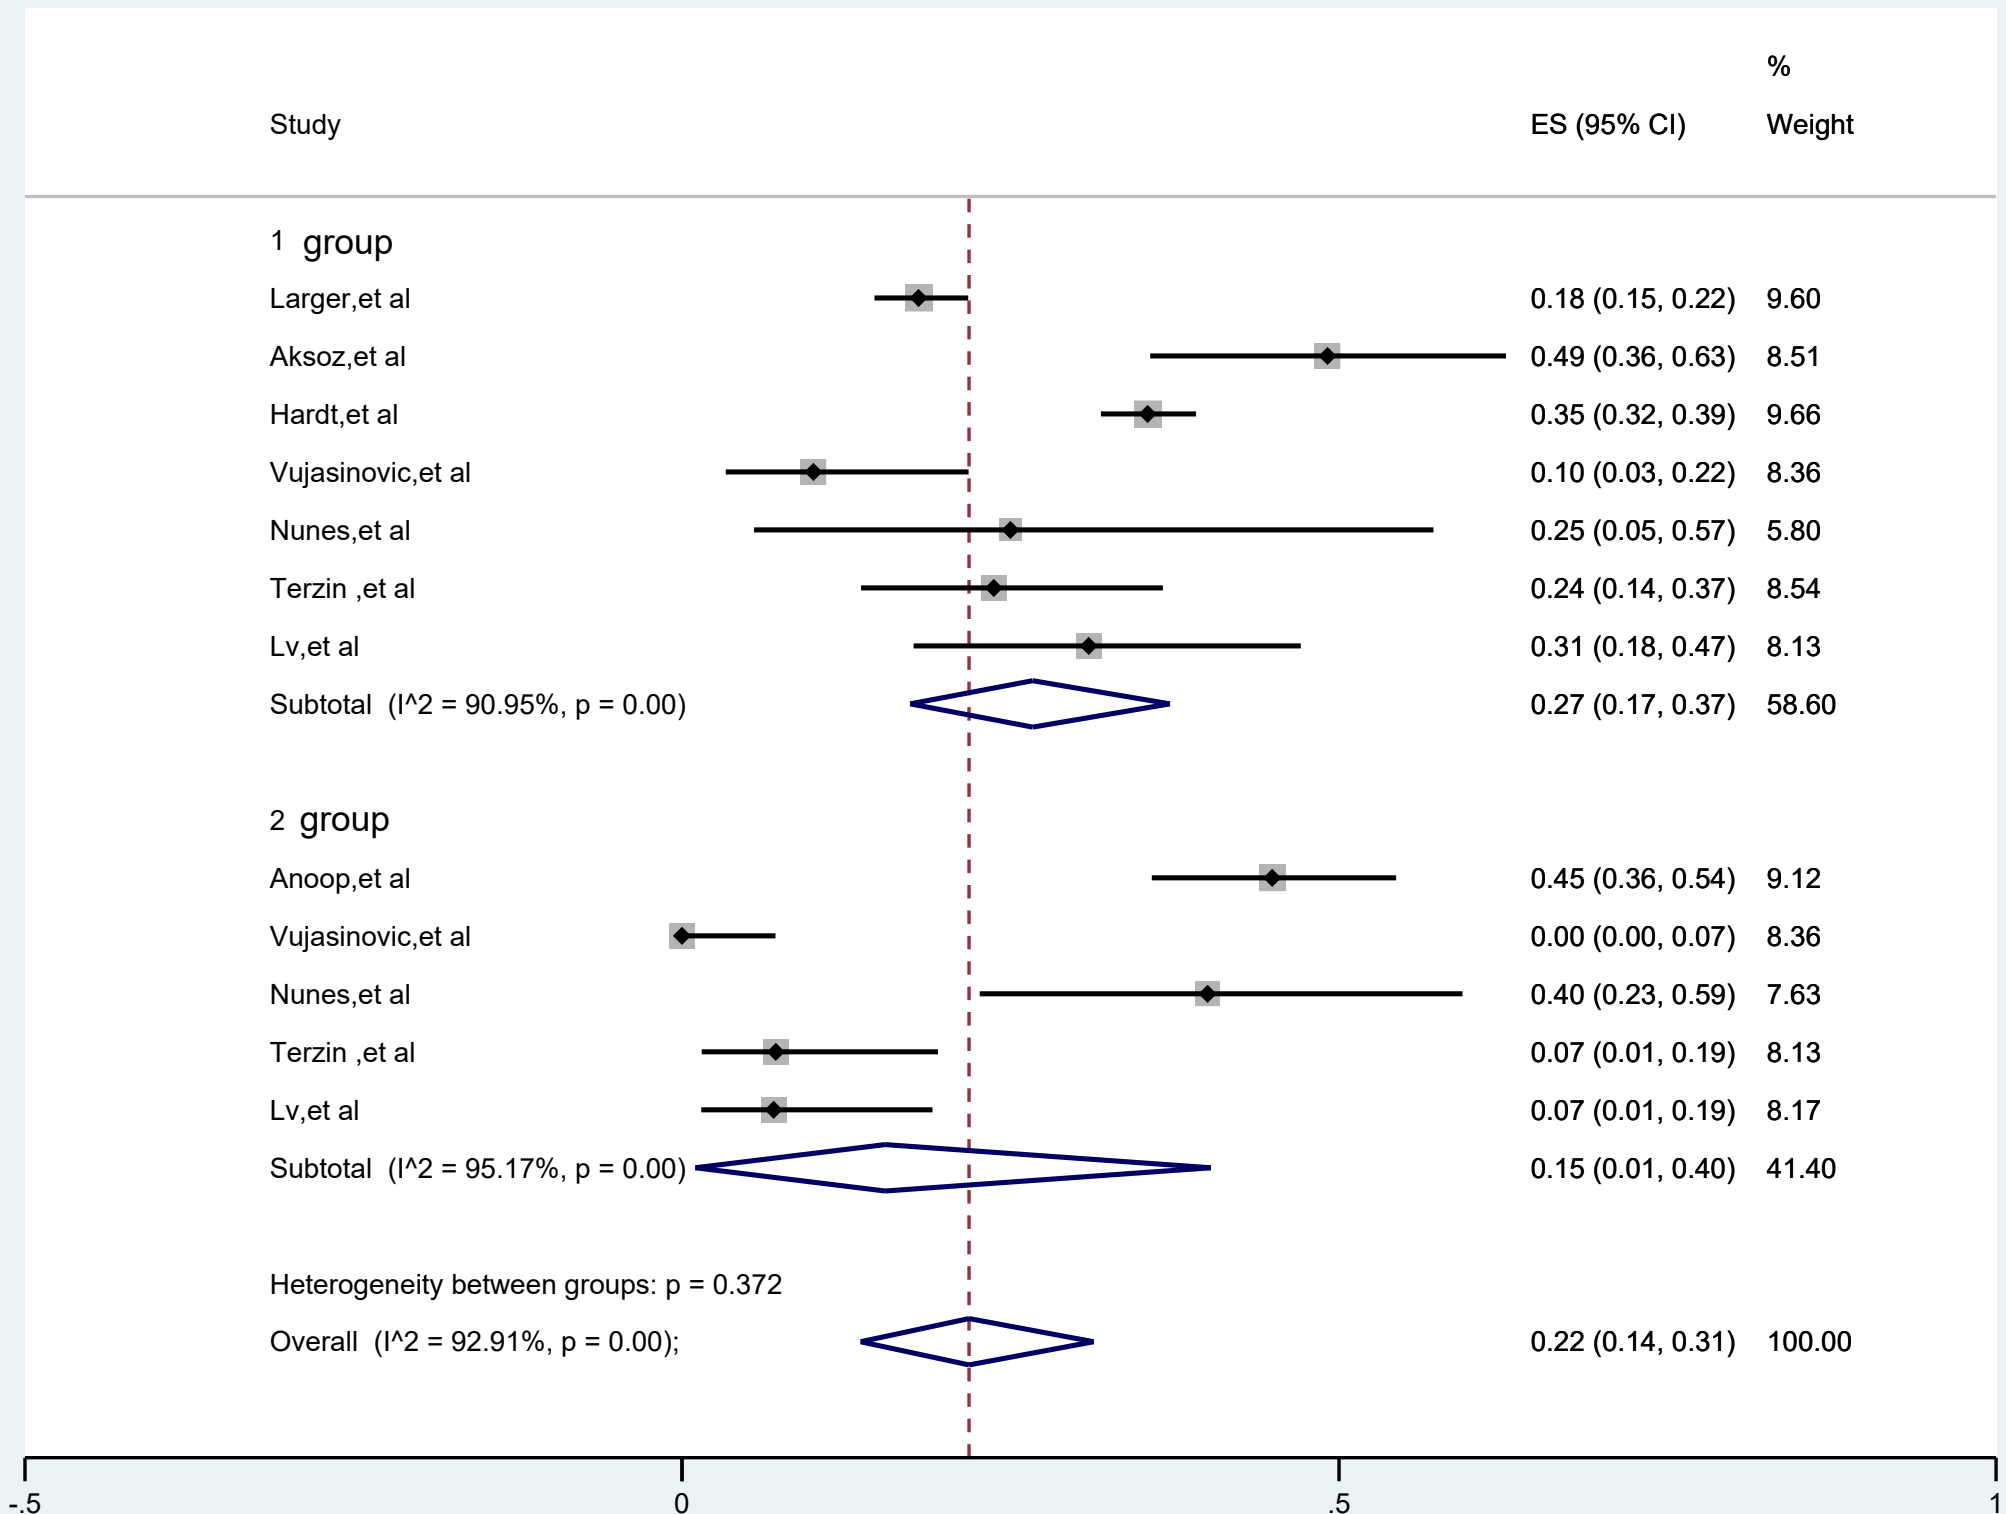

Supplement: f1 [file 7764963.f1.zip]

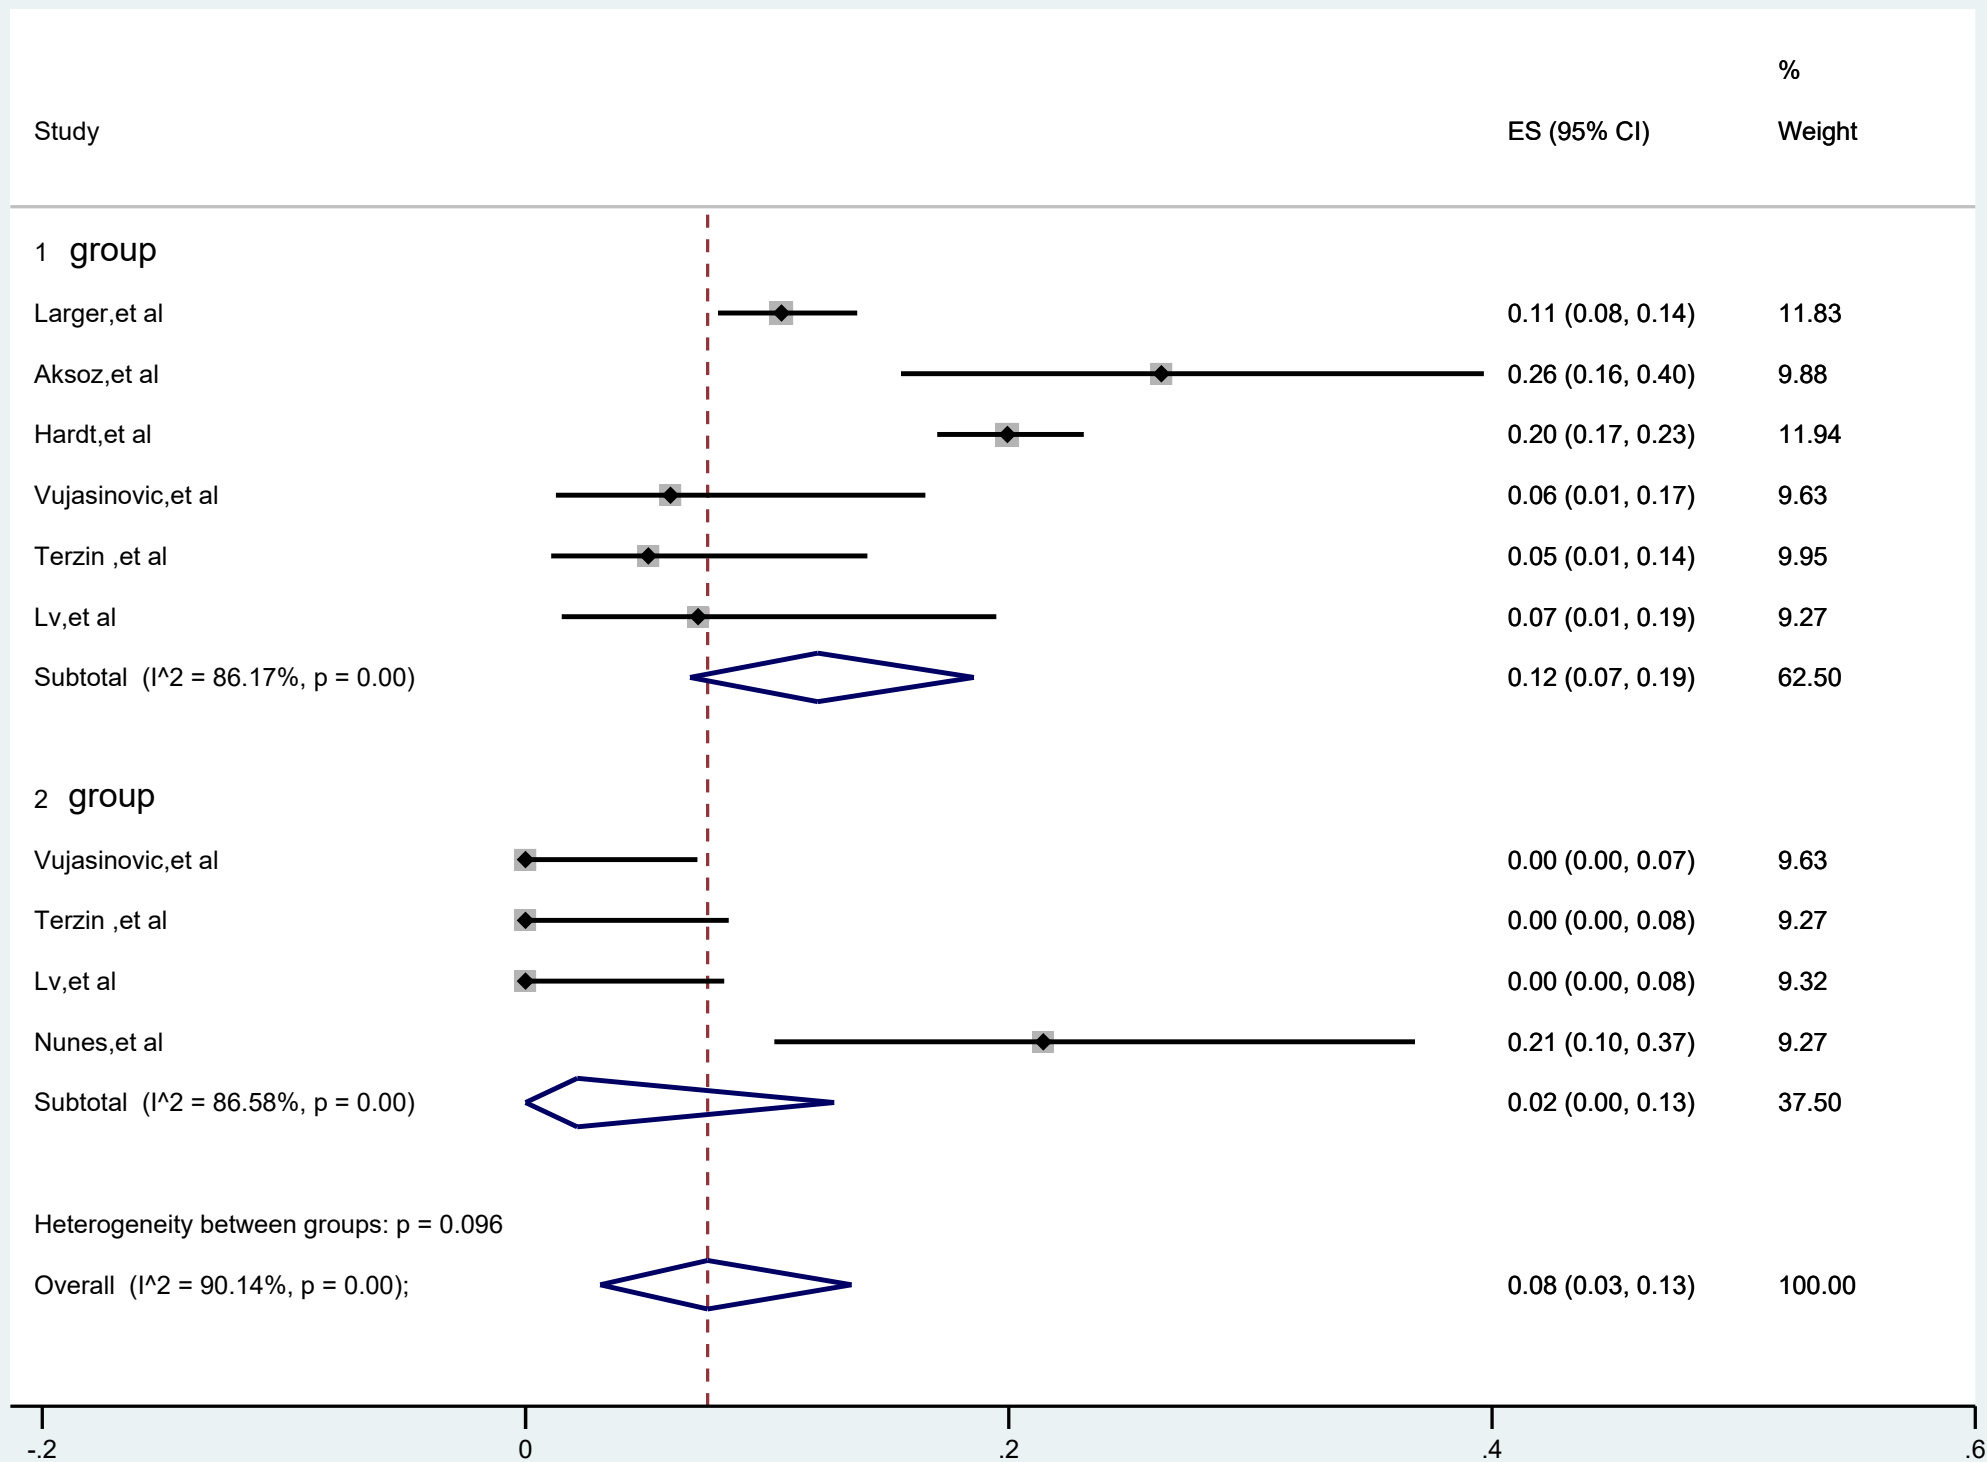

Supplement: f1 [file 7764963.f1.zip]

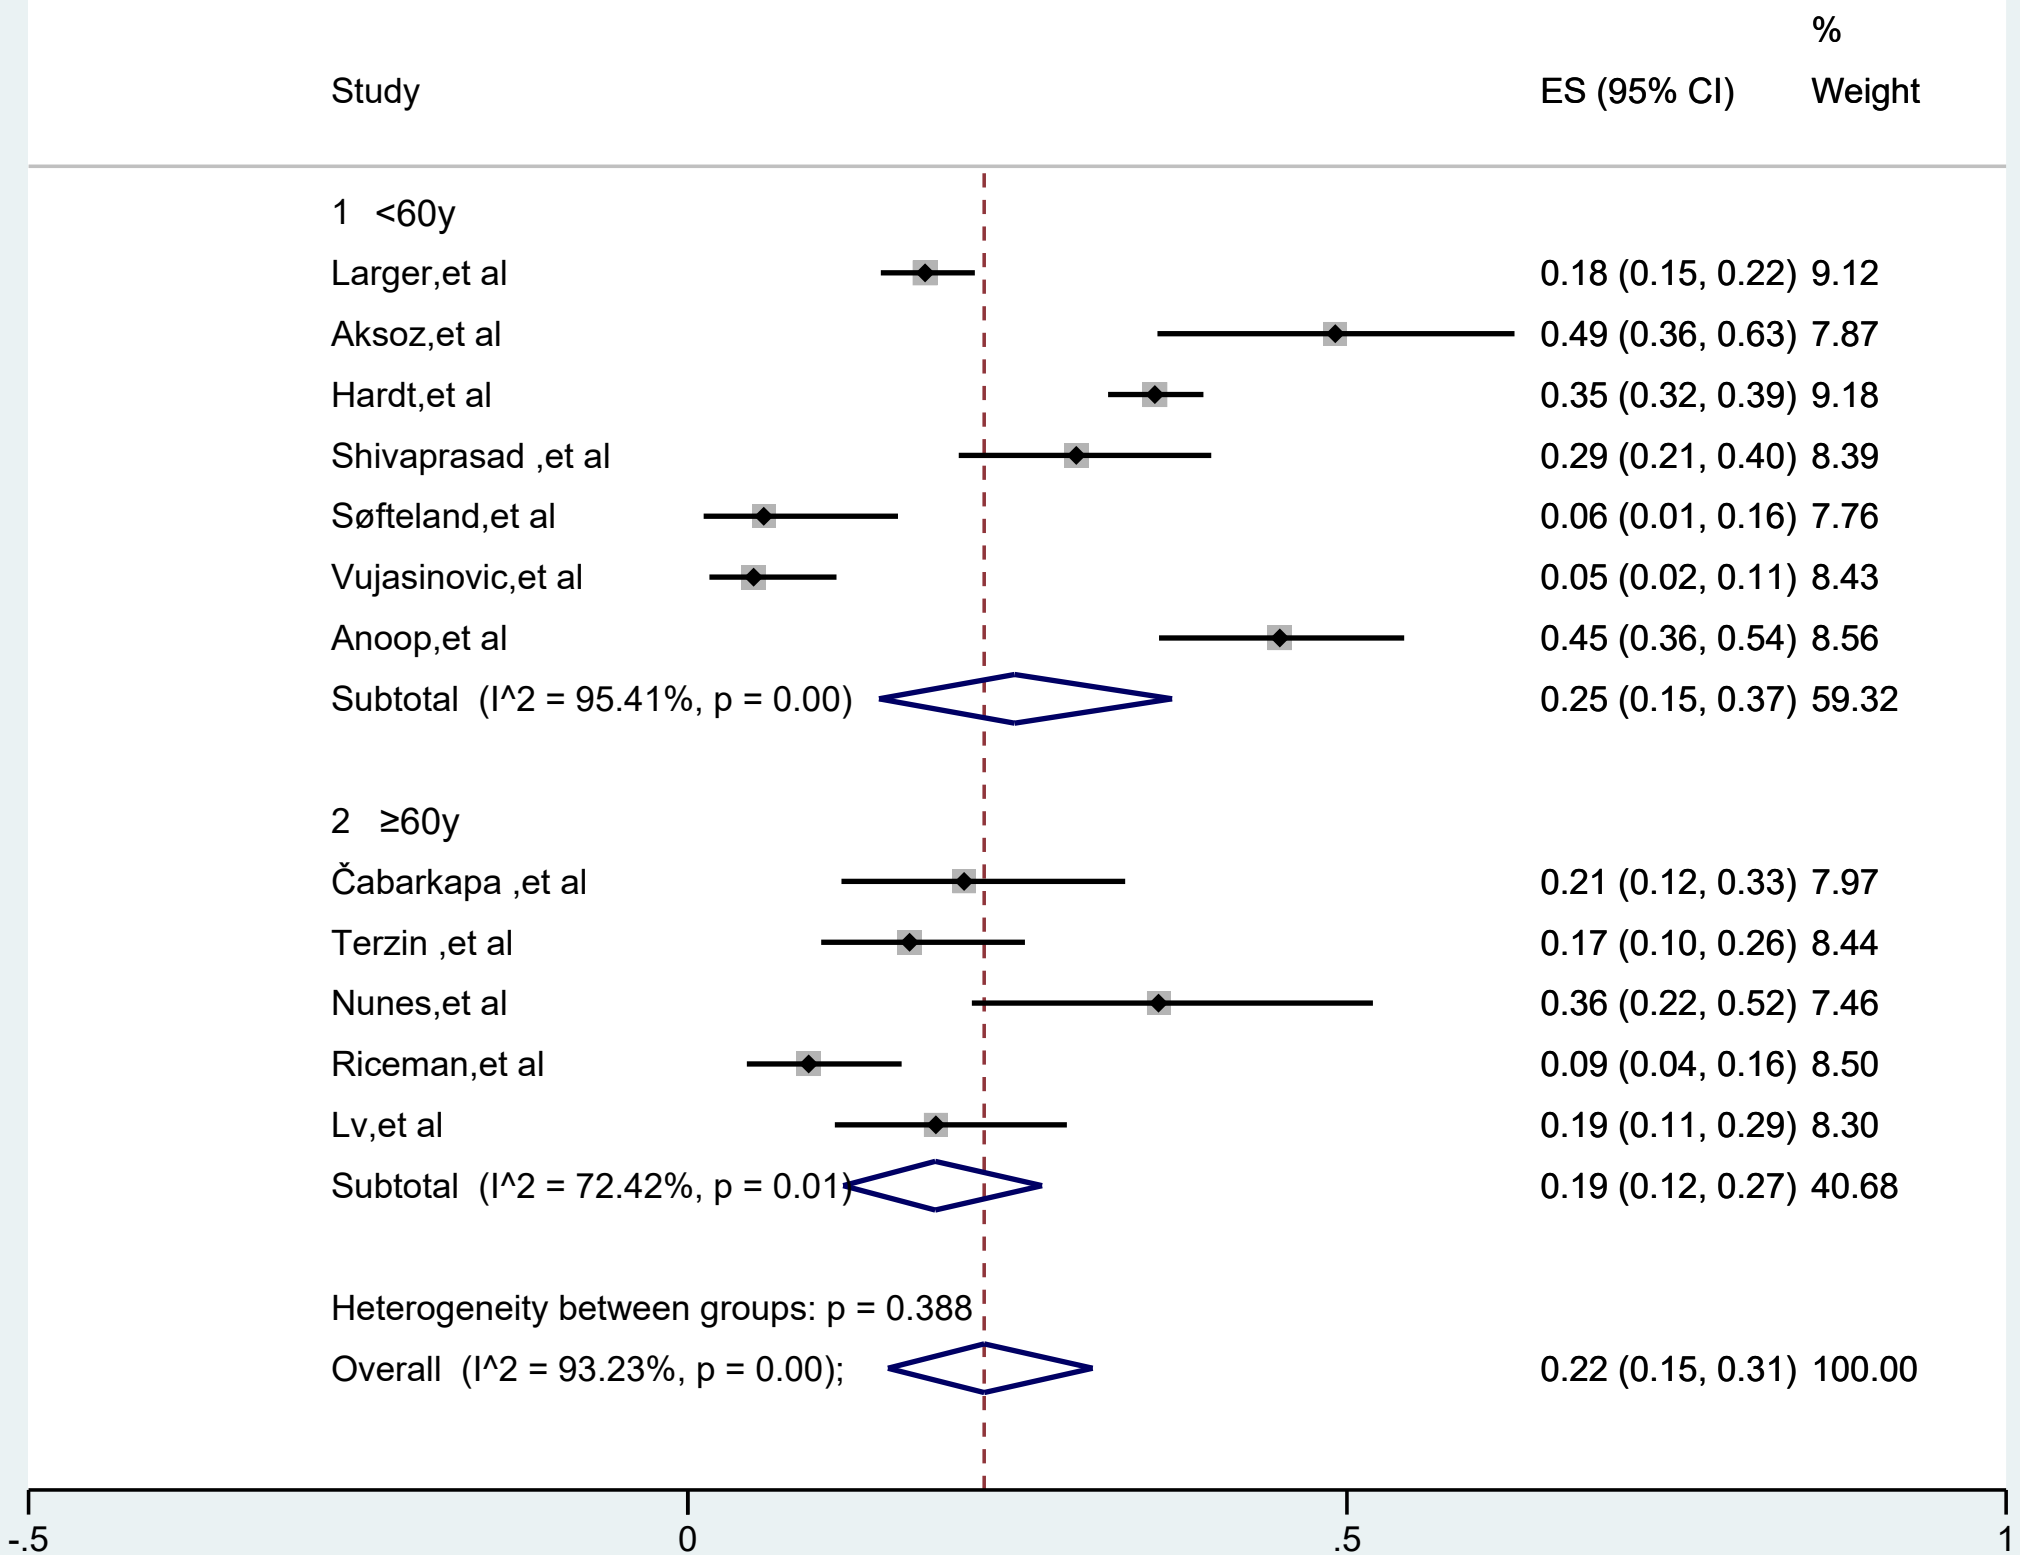

Supplement: f1 [file 7764963.f1.zip]
